# Supplementary material
Source: PubMed Central journal article supplement (PMC4351786)
Supplement: NIHMS650549-supplement-Supplemental_Data_File__doc__pdf__etc___2.pdf [file NIHMS650549-supplement-Supplemental_Data_File__doc__pdf__etc___2.pdf]

Table 2.

*Descriptive Statistics of Weight, Paw Thickness and Volume, Thermal Nocifensive Response, and DWB Weight and Surface Distributions Across Time Points (N = 45)*

|                                | Naïve group<br>(n=15) |           | Saline-treated group<br>(n=15) |           | CFA-treated group<br>(n=15) |           |
|--------------------------------|-----------------------|-----------|--------------------------------|-----------|-----------------------------|-----------|
|                                | <i>Mean</i>           | <i>SD</i> | <i>Mean</i>                    | <i>SD</i> | <i>Mean</i>                 | <i>SD</i> |
| Body Weight (g)<br>at baseline | 26.62                 | 1.79      | 25.03                          | 2.15      | 25.37                       | 1.84      |
| Caliper (mm)                   |                       |           |                                |           |                             |           |
| Baseline                       | 2.22                  | 0.10      | 2.18                           | 0.14      | 2.19                        | 0.10      |
| 3 hrs                          | 2.24                  | 0.17      | 2.30                           | 0.26      | 3.46                        | 0.36      |
| 1 day                          | 2.22                  | 0.12      | 2.23                           | 0.15      | 3.83                        | 0.30      |
| 3 day                          | 2.22                  | 0.12      | 2.23                           | 0.12      | 3.70                        | 0.43      |
| 7 day                          | 2.32                  | 0.10      | 2.27                           | 0.10      | 3.65                        | 0.26      |
| Plethysmometer (ml)            |                       |           |                                |           |                             |           |
| Baseline                       | 0.05                  | 0.02      | 0.06                           | 0.02      | 0.06                        | 0.02      |
| 3 hrs                          | 0.05                  | 0.02      | 0.06                           | 0.02      | 0.10                        | 0.03      |
| 1 day                          | 0.06                  | 0.02      | 0.05                           | 0.02      | 0.11                        | 0.03      |
| 3 day                          | 0.06                  | 0.02      | 0.06                           | 0.02      | 0.11                        | 0.03      |
| 7 day                          | 0.06                  | 0.02      | 0.06                           | 0.02      | 0.11                        | 0.03      |
| Hot plate Test (°C)            |                       |           |                                |           |                             |           |
| Baseline                       | 47.02                 | 2.06      | 46.18                          | 4.37      | 47.52                       | 1.66      |
| 3 day                          | 46.34                 | 2.54      | 47.53                          | 1.85      | 46.22                       | 3.07      |
| 7 day                          | 45.49                 | 2.75      | 46.55                          | 1.63      | 43.52                       | 4.04      |
| DWB Weight (g)                 |                       |           |                                |           |                             |           |
| Ipsilateral                    | 10.77                 | 2.63      | 13.36                          | 2.57      | 10.22                       | 2.73      |
| Baseline                       | 11.97                 | 1.35      | 11.60                          | 1.33      | 10.39                       | 2.61      |
| 3 hrs                          | 11.77                 | 1.26      | 11.22                          | 1.25      | 9.47                        | 2.08      |
| 1 day                          | 11.74                 | 1.14      | 11.61                          | 1.19      | 10.31                       | 1.59      |
| 3 day                          | 12.32                 | 1.20      | 11.78                          | 1.35      | 10.83                       | 1.51      |
| 7 day                          |                       |           |                                |           |                             |           |
| Contralateral                  |                       |           |                                |           |                             |           |
| Baseline                       | 11.21                 | 2.43      | 10.56                          | 2.67      | 10.31                       | 2.83      |
| 3 hrs                          | 11.79                 | 1.25      | 11.62                          | 1.74      | 11.42                       | 1.70      |
| 1 day                          | 12.29                 | 1.01      | 11.53                          | 1.75      | 12.14                       | 1.11      |
| 3 day                          | 12.16                 | 0.87      | 11.87                          | 1.74      | 12.03                       | 1.19      |
| 7 day                          | 12.30                 | 1.05      | 12.06                          | 1.48      | 12.38                       | 0.77      |

---

| DWB Surface (mm <sup>2</sup> ) |       |      |       |      |       |      |
|--------------------------------|-------|------|-------|------|-------|------|
| Ipsilateral                    |       |      |       |      |       |      |
| Baseline                       | 10.18 | 0.56 | 10.15 | 0.90 | 10.14 | 1.00 |
| 3 hrs                          | 9.76  | 1.13 | 9.47  | 0.76 | 8.58  | 1.42 |
| 1 day                          | 9.49  | 0.99 | 9.13  | 0.65 | 7.80  | 1.47 |
| 3 day                          | 6.64  | 0.33 | 6.60  | 0.56 | 6.11  | 0.91 |
| 7 day                          | 6.79  | 0.61 | 6.56  | 0.61 | 6.67  | 0.62 |
|                                |       |      |       |      |       |      |
| DWB Surface (mm <sup>2</sup> ) |       |      |       |      |       |      |
| Contralateral                  |       |      |       |      |       |      |
| Baseline                       | 10.33 | 0.70 | 10.19 | 1.11 | 10.28 | 0.95 |
| 3 hrs                          | 9.74  | 0.83 | 9.38  | 1.02 | 9.36  | 0.77 |
| 1 day                          | 9.62  | 0.61 | 9.13  | 1.12 | 9.79  | 0.58 |
| 3 day                          | 6.86  | 0.42 | 6.65  | 0.82 | 6.96  | 0.56 |
| 7 day                          | 6.85  | 0.47 | 6.64  | 0.78 | 7.07  | 0.32 |

---

*Note.* SD=Standard Deviation; DWB=Dynamic Weight Bearing.

For the measures of caliper and plethysmometer values of left hind paws (ipsilateral side) were shown as mean and SD in the table.
